# Supplementary material for: Class I MHC Polymorphisms Associated with Type 2 Diabetes in the Mexican Population
Source: MDPI journal article supplement (doi:10.3390/genes13050772), 2022-04-27
Supplement: s1 [file s1]

**Table S1.** Variants found in HLA-A loci related to type 2 diabetes in mexican population with statistical significance  $p < 0.005$ .

| Position in chromosome 6 (GRCh37/hg19) | dbSNP ID   | Reference/effect allele | Effect allele average frequency         | Effect allelic frequency in Mexican population* | Effect genotype frequency hetero/homozygote* | Minor allele frequency GWAS SIGMA | Protein change | Consequence      | Clinical significance (Other phenotype, diseases or trait related in <i>ClinVar</i> ) | P Value  | Odds ratio |
|----------------------------------------|------------|-------------------------|-----------------------------------------|-------------------------------------------------|----------------------------------------------|-----------------------------------|----------------|------------------|---------------------------------------------------------------------------------------|----------|------------|
| 29910358                               | rs1143146  | C/G                     | 0.477 <sup>5</sup> -0.488 <sup>1</sup>  | 0.547                                           | 0.562/0.266                                  | 0.348                             | p.L10V         | missense variant | Not Reported                                                                          | 0.000162 | 0.878      |
| 29910970                               | rs72498368 | G/A                     | 0.0280 <sup>5</sup> -0.054 <sup>1</sup> | 0.105                                           | -                                            | <b>0.0503</b>                     |                | intron variant   | Not Reported                                                                          | 0.000242 | 1.36       |
| 29909447                               | rs9260092  | G/C                     | 0.492 <sup>1</sup>                      | 0.539                                           | 0.578/0.250                                  | 0.347                             |                | intron variant   | Not Reported                                                                          | 0.000257 | 0.882      |
| 29910482                               | rs9256980  | G/A                     | 0.509 <sup>2</sup>                      | 0.562                                           | 0.375/0.312                                  | 0.405                             |                | intron variant   | Not Reported                                                                          | 0.000272 | 0.881      |
| 29909840                               | rs2734904  | G/A                     | 0.482 <sup>5</sup> -0.497 <sup>1</sup>  | 0.586                                           | 0.484/0.344                                  | 0.343                             |                | 5' UTR variant   | Not Reported                                                                          | 0.000297 | 0.883      |
| 29909559                               | rs9260101  | G/A                     | 0.451 <sup>4</sup> -0.491 <sup>1</sup>  | 0.539                                           | 0.578/0.250                                  | 0.349                             |                | intron variant   | Not Reported                                                                          | 0.000304 | 0.883      |
| 29909372                               | rs9260086  | C/G                     | 0.476 <sup>4</sup> -0.489 <sup>1</sup>  | 0.539                                           | 0.578/0.250                                  | 0.347                             |                | intron variant   | Not Reported                                                                          | 0.000310 | 0.883      |
| 29909523                               | rs9260098  | A/C                     | 0.414 <sup>3</sup> -0.430 <sup>1</sup>  | 0.586                                           | 0.547/0.312                                  | 0.374                             |                | intron variant   | Not Reported                                                                          | 0.000311 | 0.882      |

|          |             |     |                                            |                         |             |        |         |                                            |                 |          |       |
|----------|-------------|-----|--------------------------------------------|-------------------------|-------------|--------|---------|--------------------------------------------|-----------------|----------|-------|
| 29910429 | rs9260123   | C/G | 0.468 <sup>6</sup> -<br>0.495 <sup>1</sup> | 0.618                   | -           | 0.360  |         | intron variant                             | Not<br>Reported | 0.000492 | 0.886 |
| 29909339 | rs9260084   | G/A | 0.472 <sup>4</sup> -<br>0.488 <sup>1</sup> | 0.566                   | -           | 0.378  |         | intron variant                             | Not<br>Reported | 0.000586 | 0.888 |
| 29911063 | rs199474485 | T/G | 0.190 <sup>3</sup> -<br>0.339 <sup>1</sup> | 0.328                   | 0.438/0.109 | 0.380  | p.I121R | missense<br>variant                        | Not<br>Reported | 0.000931 | 0.894 |
| 29910577 | rs45617033  | C/T | 0 <sup>5</sup> -<br>0.00218 <sup>2</sup>   | 5.9004e-05 <sup>1</sup> | -           | 0.0540 | p.P39P  | synonymous<br>variant                      | Not<br>Reported | 0.00205  | 0.759 |
| 29912188 | rs9260184   | T/C | 0.351 <sup>2</sup> -<br>0.370 <sup>1</sup> | 0.399                   | -           | 0.478  |         | intron variant                             | Not<br>Reported | 0.00212  | 0.904 |
| 29911019 | rs9260149   | T/C | 0.241-<br>0.375 <sup>1</sup>               | 0.398                   | 0.484/0.156 | 0.458  |         | intron variant                             | Not<br>Reported | 0.00221  | 0.902 |
| 29911037 | rs9260152   | G/C | 0.144 <sup>2</sup> -<br>0.391 <sup>1</sup> | 0.414                   | 0.453/0.188 | 0.483  |         | splice region<br>variant/intron<br>variant | Not<br>Reported | 0.00234  | 0.903 |
| 29911307 | rs199474578 | G/A | 0.019 <sup>2</sup> -<br>0.014 <sup>1</sup> | 0.023                   | -           | 0.0499 | p.T202T | synonymous<br>variant                      | Not<br>Reported | 0.00255  | 1.27  |
| 29910663 | rs707910    | G/A | 0.091 <sup>3</sup> -<br>0.187 <sup>5</sup> | 0.047                   | 0.906/0.094 | 0.0544 | p.R68K  | missense<br>variant                        | Not<br>Reported | 0.00265  | 1.24  |
| 29910508 | rs9260129   | A/G | 0.313 <sup>3</sup> -<br>0.384 <sup>1</sup> | 0.750                   | 0.531/0.438 | 0.253  |         | intron variant                             | Not<br>Reported | 0.00265  | 0.889 |
| 29910892 | rs9260145   | A/G | 0.376 <sup>4</sup> -<br>0.383 <sup>5</sup> | 0.405                   | -           | 0.481  |         | intron variant                             | Not<br>Reported | 0.00285  | 0.906 |

|          |             |                     |                                            |       |             |        |            |                          |                 |         |       |
|----------|-------------|---------------------|--------------------------------------------|-------|-------------|--------|------------|--------------------------|-----------------|---------|-------|
| 29910437 | rs9260124   | C/T                 | 0.344 <sup>6</sup> -<br>0.376 <sup>1</sup> | 0.449 | -           | 0.462  |            | intron variant           | Not<br>Reported | 0.00293 | 0.904 |
| 29911092 | rs1136702   | G/T                 | 0.163 <sup>2</sup> -<br>0.270 <sup>1</sup> | 0.250 | 0.375-0.062 | 0.327  | p.G131W    | missense<br>variant      | Not<br>Reported | 0.00335 | 0.901 |
| 29909499 | rs71554994  | A/T                 | -                                          | -     | -           | 0.281  |            | intron variant           | Not<br>Reported | 0.00348 | 0.897 |
| 29910730 | rs576213756 | T/<br>TCTCCAAGACCAA | 0.001 <sup>3</sup>                         | 0.008 | -           | 0.483  | p.N90NLQDQ | inframe<br>insertion     | Not<br>Reported | 0.00354 | 0.908 |
| 29909021 | rs2571420   | C/G                 | 0.090 <sup>3</sup> -<br>0.188 <sup>5</sup> | 0.047 | 0.906/0.094 | 0.0642 |            | upstream<br>gene variant | Not<br>Reported | 0.00375 | 1.21  |
| 29910034 | rs2735114   | G/A                 | 0.387 <sup>1</sup> -<br>0.398 <sup>3</sup> | 0.414 | 0.516/0.156 | 0.498  |            | 5' UTR<br>variant        | Not<br>Reported | 0.00394 | 0.911 |
| 29911154 | rs1059509   | C/A                 | 0.447 <sup>1</sup> -<br>0.458 <sup>3</sup> | 0.523 | 0.516/0.266 | 0.384  | p.N151K    | missense<br>variant      | Not<br>Reported | 0.00438 | 0.907 |
| 29911727 | rs9280790   | T/C                 | -                                          | -     | -           | 0.490  |            | intron variant           | Not<br>Reported | 0.00442 | 0.904 |

---

\*Allelic frequencies were estimated using 1000G (1000 *genomes project phase 3*) data from Mexican American from Los Angeles population and Latino population from *GnomAD* database. Genotype frequencies also were estimated using 1000G. Average frequency was consulted from highest and lowest frequencies from *GnomAD*,<sup>1</sup> *ExAC*,<sup>2</sup> 1000G,<sup>3</sup> *ALSPAC*,<sup>4</sup> *TWINSUK*<sup>5</sup> and *GO-ESP*<sup>6</sup> information published in *dbSNP* database, available in <https://www.ncbi.nlm.nih.gov/snp/>

**Table S2.** Variants found in HLA-B loci related to type 2 diabetes in mexican population with statistical significance  $p < 0.005$ .

| Position in chromosome 6 (GRCh37/hg19) | dbSNP ID       | Reference/effect allele      | Effect allele average frequency             | Effect allelic frequency in Mexican population* | Effect genotype frequency hetero/homozygote* | Protein change    | Consequence        | Clinical significance (Other phenotype, diseases or trait related in <i>ClinVar</i> ) | P Value  | Odds ratio |
|----------------------------------------|----------------|------------------------------|---------------------------------------------|-------------------------------------------------|----------------------------------------------|-------------------|--------------------|---------------------------------------------------------------------------------------|----------|------------|
| 31324100                               | rs1050654      | G/T                          | 0.413 <sup>2</sup>                          | 0.469                                           | -                                            | p.R155S           | missense variant   | Atopic dermatitis                                                                     | 0.000103 | 0.868      |
| 31323353                               |                | G/<br>GTGTCTTTGGGGGTCAC<br>A |                                             | -                                               | -                                            | p.H212HVTPQR<br>H | inframe insertion  | Not Reported                                                                          | 0.000978 | 0.901      |
| 31324086                               | rs709054       | G/A                          | 0.016 <sup>3</sup>                          | 0.008                                           | 0.016/-                                      | p.A159A           | synonymous variant | Not Reported                                                                          | 0.00152  | 0.891      |
| 31323233                               | rs709052       | A/G                          | 0.436 <sup>1</sup> -<br>0.416 <sup>5</sup>  | 0.484                                           | 0.594/0.182                                  | p.T252T           | synonymous variant | Not Reported                                                                          | 0.00167  | 0.904      |
| 31323885                               | rs4154921<br>7 | G/T                          | 0.031-<br>0.0520                            | 0.055                                           | 0.891/0.109                                  |                   | intron variant     | Clozapine-induced agranulocytosis                                                     | 0.00285  | 0.869      |
| 31324077                               | rs709053       | C/G                          | 0.393 <sup>3</sup>                          | 0.461                                           | 0.764/0.094                                  | p.T162T           | synonymous variant | Not Reported                                                                          | 0.00314  | 0.898      |
| 31323567                               | rs4081560      | G/A                          | 0.141 <sup>1</sup> -<br>0.090 <sup>3</sup>  | 0.211                                           | 0.391/0.016                                  |                   | intron variant     | Not Reported                                                                          | 0.00376  | 0.895      |
| 31323677                               | rs4081559      | C/T                          | 0.090 <sup>3</sup> -<br>0.1154 <sup>1</sup> | 0.211                                           | 0.391/0.016                                  |                   | intron variant     | Not Reported                                                                          | 0.00434  | 0.897      |
| 31323875                               | rs4156022<br>0 | C/T                          | 0.078 <sup>1</sup> -<br>0.054 <sup>3</sup>  | 0.141                                           | 0.250/0.016                                  |                   | intron variant     | Not Reported                                                                          | 0.00439  | 0.888      |

\*Allelic frequencies were estimated using 1000G (1000 genomes project phase 3) data from Mexican American from Los Angeles population and Latino population from *GnomAD* database. Genotype frequencies also were estimated using 1000G. Average frequency was consulted from highest and lowest frequencies from *GnomAD*,<sup>1</sup> *ExAC*,<sup>2</sup> 1000G,<sup>3</sup> *ALSPAC*,<sup>4</sup> *TWINSUK*<sup>5</sup> and *GO-ESP*<sup>6</sup> information published in *dbSNP* database, available in <https://www.ncbi.nlm.nih.gov/snp/>

**Table S3.** Variants found in HLA-C loci related to type 2 diabetes in mexican population with statistical significance  $p < 0.005$ .

| Position in chromosome 6 (GRCh37/hg19) | dbSNP ID    | Reference/effect allele | Effect allele average frequency        | Effect allele frequency in Mexican population* | Effect genotype frequency hetero/homozygote* | Protein change | Consequence      | Clinical significance (Other phenotype, diseases or trait related in <i>ClinVar</i> ) | P Value | Odds ratio |
|----------------------------------------|-------------|-------------------------|----------------------------------------|------------------------------------------------|----------------------------------------------|----------------|------------------|---------------------------------------------------------------------------------------|---------|------------|
| 31239407                               | rs17408553  | G/T                     | 0.352 <sup>6</sup> -0.433 <sup>4</sup> | 0.344                                          | 0.500/0.094                                  | p.N104K        | missense variant | Not Reported                                                                          | 0.00203 | 1.11       |
| 31239417                               | rs2308557   | C/T                     | 0.337 <sup>5</sup> -0.4021             | 0.344                                          | 0.500/0.094                                  | p.S101N        | missense variant | Not Reported                                                                          | 0.00212 | 1.11       |
| 31239101                               | rs1131115** | G/T                     | 0.337 <sup>5</sup> -0.434 <sup>6</sup> | 0.625                                          | 0.112/0.354                                  | p.S123Y        | missense variant | Not Reported                                                                          | 0.00254 | 1.14       |
| 31236998                               | rs2001181   | C/T                     | 0.111 <sup>3</sup> -0.139 <sup>1</sup> | 0.906                                          | 0.188/0.812                                  | p.N104K        | intron variant   | Not Reported                                                                          | 0.00265 | 1.14       |
| 31236853                               | rs1065711   | G/A                     | 0.111 <sup>3</sup> -0.155 <sup>4</sup> | 0.906                                          | 0.188/0.812                                  | p.S101N        | 3' UTR variant   | Not Reported                                                                          | 0.00266 | 1.14       |
| 31239306                               | rs7383157   | T/G                     | 0.111 <sup>3</sup> -0.129 <sup>1</sup> | 0.906                                          | 0.188/0.812                                  | p.S123Y        | intron variant   | Not Reported                                                                          | 0.00375 | 1.13       |

\*Allelic frequencies were estimated using 1000G (1000 *genomes project phase 3*) data from Mexican American from Los Angeles population and Latino population from *GnomAD* database. Genotype frequencies also were estimated using 1000G. \*\* This variant was found in *GWAS SIGMA* and *SIGMA exome chip analysis*. Average frequency was consulted from highest and lowest frequencies from *GnomAD*,<sup>1</sup> *ExAC*,<sup>2</sup> 1000G,<sup>3</sup> *ALSPAC*,<sup>4</sup> *TWINSUK*<sup>5</sup> and *GO-ESP*<sup>6</sup> information published in *dbSNP* database, available in <https://www.ncbi.nlm.nih.gov/snp/>.

**Table S4.** HLA-A\*03:01:01:01 protein sequence variants found in mexican population with type 2 diabetes.

| Amino acid<br>residue<br>position | Reference<br>Amino acid<br>Codon | Variants registered IPD-IMGT/HLA database |       |                              | T2D GWAS SIGMA<br>Amino acid<br>Codon |
|-----------------------------------|----------------------------------|-------------------------------------------|-------|------------------------------|---------------------------------------|
|                                   |                                  | Amino acid                                | Codon | Database number of registers |                                       |
| 68                                | Arginine<br>AGG                  | Lysine                                    | AAG   | 4968                         | Lysine<br>AAG                         |
|                                   |                                  | Lysine                                    | AAA   | 4                            |                                       |
|                                   |                                  | Arginine                                  | AGG   | 3                            |                                       |
|                                   |                                  | Glutamic Acid                             | GAG   | 2                            |                                       |
| 202                               | Threonine<br>ACG                 | Arginine                                  | AGG   | 2381                         | Threonine<br>ACA                      |
|                                   |                                  | Arginine                                  | AGA   | 410                          |                                       |
|                                   |                                  | Lysine                                    | AAA   | 1                            |                                       |
|                                   |                                  | Tryptophan                                | TGG   | 1                            |                                       |
|                                   |                                  | Arginine                                  | CGA   | 1                            |                                       |
|                                   |                                  | Serine                                    | AGT   | 1                            |                                       |
|                                   |                                  | Lysine                                    | AAG   | 1                            |                                       |

The HLA polymorphisms register was obtained from IPD-IMGT/HLA database using the *polymorphism search tool* available at <https://www.ebi.ac.uk/ipd/imgt/hla/polymorph.html>.

**Table S5.** HLA-C\*01:02:01:01 protein sequence variants found in mexican population with type 2 diabetes.

| Amino acid<br>residue<br>position | Reference<br>Amino acid<br>Codon | Variants registered IPD-IMGT/HLA database |       |                              | T2D GWAS SIGMA<br>Amino acid<br>Codon |
|-----------------------------------|----------------------------------|-------------------------------------------|-------|------------------------------|---------------------------------------|
|                                   |                                  | Amino acid                                | Codon | Database number of registers |                                       |
| 101                               | Serine<br>TCG                    | Cysteine                                  | TGC   | 4885                         | Asparagine<br>TTG*                    |
|                                   |                                  | Cysteine                                  | TGT   | 4                            |                                       |
|                                   |                                  | Tyrosine                                  | TAC   | 4                            |                                       |
|                                   |                                  | Tryptophan                                | TGG   | 3                            |                                       |
|                                   |                                  | Serine                                    | AGC   | 2                            |                                       |
|                                   |                                  | Glycine                                   | GGC   | 2                            |                                       |
|                                   |                                  | Arginine                                  | CGC   | 1                            |                                       |
| 104                               | Asparagine<br>TTG                | Glycine                                   | GGG   | 4871                         | Lysine<br>TTC*                        |
|                                   |                                  | Glycine                                   | GGT   | 8                            |                                       |
|                                   |                                  | Glutamic Acid                             | GAG   | 6                            |                                       |
|                                   |                                  | Arginine                                  | AGG   | 4                            |                                       |
|                                   |                                  | Glycine                                   | GGA   | 4                            |                                       |
|                                   |                                  | Arginine                                  | CGG   | 3                            |                                       |
|                                   |                                  | Alanine                                   | GCG   | 3                            |                                       |
|                                   |                                  | Tryptophan                                | TGG   | 1                            |                                       |
|                                   |                                  | Valine                                    | GTG   | 1                            |                                       |
|                                   |                                  | Tyrosine                                  | ATG   | 4893                         |                                       |
| 123                               | Serine<br>AGA                    | Tyrosine                                  | ATA   | 4                            | Tyrosine<br>ATA                       |
|                                   |                                  | Aspartic Acid                             | GAC   | 2                            |                                       |
|                                   |                                  | Phenylalanine                             | TTC   | 1                            |                                       |
|                                   |                                  | Histidine                                 | CAC   | 1                            |                                       |

\*Variant not described in the IPD-IMGT/HLA database.

HLA allele polymorphisms were obtained from IPD-IMGT/HLA database, using the *polymorphism search tool* available at <https://www.ebi.ac.uk/ipd/imgt/hla/polymorph.html>.

**Table S6.** Polymorphisms found in HLA-A\*03:01:01:01 and HLA-C\*01:02:01:01 alleles. The residues 26 to 114 correspond to alpha-1 chain and 115 to 204 to alpha-2 chain; both part of the hypervariable region in the peptide-binding cleft related with antigen recognition. Variants found in our analysis are marked with a red arrow. The position references were taken from <https://www.uniprot.org/uniprot/P01891>. HLA allele polymorphisms were obtained from IPD-IMGT/HLA database, using the polymorphism search tool available at <https://www.ebi.ac.uk/ipd/imgt/hla/polymorph.html>. Only variants with statistical significance less than 0.05 and odds ratio more than 1.0 were considered.

## HLA-A\*03:01:01:01

|                     | Residues                                                                           |     |     |    |    |     |    |     |     |     |     |     |     |     |     |     |     |     |     |     |     |  |
|---------------------|------------------------------------------------------------------------------------|-----|-----|----|----|-----|----|-----|-----|-----|-----|-----|-----|-----|-----|-----|-----|-----|-----|-----|-----|--|
|                     | 26                                                                                 | 27  | 28  | 29 | 30 | 31  | 32 | 33  | 34  | 35  | 36  | 37  | 38  | 39  | 40  | 41  | 42  | 43  | 44  | 45  | 46  |  |
| Variability         | 0                                                                                  | 0.1 | 0   | 0  | 0  | 0.1 | 0  | 1.8 | 0   | 0   | 0.1 | 0   | 0   | 0   | 0   | 0.3 | 0   | 0   | 0   | 0   | 0   |  |
| Reference residue   | S                                                                                  | H   | S   | M  | R  | Y   | F  | F   | T   | S   | V   | S   | R   | P   | G   | R   | G   | E   | P   | R   | F   |  |
| Polymorphic residue | S                                                                                  | H   | S   | M  | R  | Y   | F  | F   | T   | S   | V   | S   | R   | P   | G   | R   | G   | E   | P   | R   | F   |  |
|                     |                                                                                    |     |     |    |    |     |    |     |     |     |     |     |     |     |     |     |     |     |     |     |     |  |
|                     | 47                                                                                 | 48  | 49  | 50 | 51 | 52  | 53 | 54  | 55  | 56  | 57  | 58  | 59  | 60  | 61  | 62  | 63  | 64  | 65  | 66  | 67  |  |
| Variability         | 0                                                                                  | 0   | 0   | 0  | 0  | 0   | 0  | 0   | 0.1 | 0   | 0   | 0   | 0   | 0   | 0   | 0   | 0   | 0   | 0   | 0   | 0.2 |  |
| Reference residue   | I                                                                                  | A   | V   | G  | Y  | V   | D  | D   | T   | Q   | F   | V   | R   | F   | D   | S   | D   | A   | A   | S   | Q   |  |
| Polymorphic residue | I                                                                                  | A   | V   | G  | Y  | V   | D  | D   | T   | Q   | F   | V   | R   | F   | D   | S   | D   | A   | A   | S   | Q   |  |
|                     |                                                                                    |     |     |    |    |     |    |     |     |     |     |     |     |     |     |     |     |     |     |     |     |  |
|                     |  |     |     |    |    |     |    |     |     |     |     |     |     |     |     |     |     |     |     |     |     |  |
|                     | 68                                                                                 | 69  | 70  | 71 | 72 | 73  | 74 | 75  | 76  | 77  | 78  | 79  | 80  | 81  | 82  | 83  | 84  | 85  | 86  | 87  | 88  |  |
| Variability         | 0.3                                                                                | 0   | 0   | 0  | 0  | 0   | 0  | 0   | 0   | 0   | 0   | 0   | 0.5 | 0   | 0   | 0   | 0   | 0   | 2.1 | 1   | 0   |  |
| Reference residue   | R                                                                                  | M   | E   | P  | R  | A   | P  | W   | I   | E   | Q   | E   | G   | P   | E   | Y   | W   | D   | G   | E   | T   |  |
| Polymorphic residue | K                                                                                  | M   | E   | P  | R  | A   | P  | W   | I   | E   | Q   | E   | G   | P   | E   | Y   | W   | D   | G   | E   | T   |  |
|                     |                                                                                    |     |     |    |    |     |    |     |     |     |     |     |     |     |     |     |     |     |     |     |     |  |
|                     | 89                                                                                 | 90  | 91  | 92 | 93 | 94  | 95 | 96  | 97  | 98  | 99  | 100 | 101 | 102 | 103 | 104 | 105 | 106 | 107 | 108 | 109 |  |
| Variability         | 0.7                                                                                | 1.1 | 0.3 | 0  | 0  | 0.8 | 0  | 0   | 0.4 | 0.9 | 0   | 1.4 | 1.2 | 0   | 0.8 | 0.8 | 0.8 | 0.8 | 0.8 | 0   | 0   |  |
| Reference residue   | R                                                                                  | K   | V   | K  | A  | H   | S  | Q   | T   | H   | R   | V   | D   | L   | G   | T   | L   | R   | G   | Y   | Y   |  |
| Polymorphic residue | R                                                                                  | N   | V   | K  | A  | Q   | S  | Q   | T   | D   | R   | V   | D   | L   | G   | T   | L   | R   | G   | Y   | Y   |  |



|                     | Residues |     |     |     |     |     |     |     |     |     |     |     |     |     |     |     |     |     |     |     |     |
|---------------------|----------|-----|-----|-----|-----|-----|-----|-----|-----|-----|-----|-----|-----|-----|-----|-----|-----|-----|-----|-----|-----|
|                     | 110      | 111 | 112 | 113 | 114 | 115 | 116 | 117 | 118 | 119 | 120 | 121 | 122 | 123 | 124 | 125 | 126 | 127 | 128 | 129 | 130 |
| Variability         | 0        | 0   | 0   | 0   | 0.8 | 0   | 0   | 0   | 0   | 1.4 | 0   | 1.5 | 0   | 0.8 | 0   | 0   | 0   | 0   | 0   | 0.9 | 0   |
| Reference residue   | N        | Q   | S   | E   | A   | G   | S   | H   | T   | V   | Q   | R   | M   | Y   | G   | C   | D   | V   | G   | S   | D   |
| Polymorphic residue | N        | Q   | S   | E   | A   | G   | S   | H   | T   | I   | Q   | I   | M   | Y   | G   | C   | D   | V   | G   | S   | D   |

|                     | 131 | 132 | 133 | 134 | 135 | 136 | 137 | 138 | 139 | 140 | 141 | 142 | 143 | 144 | 145 | 146 | 147 | 148 | 149 | 150 | 151 |
|---------------------|-----|-----|-----|-----|-----|-----|-----|-----|-----|-----|-----|-----|-----|-----|-----|-----|-----|-----|-----|-----|-----|
| Variability         | 0.8 | 0   | 0.4 | 0   | 0   | 0   | 0   | 1.8 | 0   | 1.4 | 0   | 0   | 0   | 0   | 0   | 0   | 0   | 0   | 0   | 0   | 1   |
| Reference residue   | W   | R   | F   | L   | R   | G   | Y   | H   | Q   | Y   | A   | Y   | D   | G   | K   | D   | Y   | I   | A   | L   | K   |
| Polymorphic residue | G   | R   | F   | L   | R   | G   | Y   | R   | Q   | D   | A   | Y   | D   | G   | K   | D   | Y   | I   | A   | L   | N   |

|                     | 152 | 153 | 154 | 155 | 156 | 157 | 158 | 159 | 160 | 161 | 162 | 163 | 164 | 165 | 166 | 167 | 168 | 169 | 170 | 171 | 172 |
|---------------------|-----|-----|-----|-----|-----|-----|-----|-----|-----|-----|-----|-----|-----|-----|-----|-----|-----|-----|-----|-----|-----|
| Variability         | 0   | 0   | 0   | 0   | 0   | 0   | 0   | 0   | 0   | 0   | 0.1 | 0   | 0   | 0   | 0.9 | 0   | 1   | 0.9 | 0   | 0   | 0   |
| Reference residue   | E   | D   | L   | R   | S   | W   | T   | A   | A   | D   | M   | A   | A   | Q   | T   | T   | K   | H   | K   | W   | E   |
| Polymorphic residue | E   | D   | L   | R   | S   | W   | T   | A   | A   | D   | M   | A   | A   | Q   | I   | T   | K   | R   | K   | W   | E   |

|                     | 173 | 174 | 175 | 176 | 177 | 178 | 179 | 180 | 181 | 182 | 183 | 184 | 185 | 186 | 187 | 188 | 189 | 190 | 191 | 192 | 193 |
|---------------------|-----|-----|-----|-----|-----|-----|-----|-----|-----|-----|-----|-----|-----|-----|-----|-----|-----|-----|-----|-----|-----|
| Variability         | 0.6 | 0.3 | 0.8 | 1.4 | 0   | 0   | 0   | 1.7 | 0   | 0.3 | 0   | 0   | 0.4 | 0   | 0.9 | 0   | 0   | 0.7 | 0.7 | 0   | 0   |
| Reference residue   | A   | A   | H   | V   | A   | E   | Q   | L   | R   | A   | Y   | L   | E   | G   | T   | C   | V   | E   | W   | L   | R   |
| Polymorphic residue | A   | A   | H   | E   | A   | E   | Q   | L   | R   | A   | Y   | L   | D   | G   | T   | C   | V   | E   | W   | L   | R   |

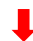

|                     | 194 | 195 | 196 | 197 | 198 | 199 | 200 | 201 | 202 | 203 | 204 |
|---------------------|-----|-----|-----|-----|-----|-----|-----|-----|-----|-----|-----|
| Variability         | 0   | 0.2 | 0   | 0   | 0   | 0   | 0   | 0   | 0   | 0   | 0   |
| Reference residue   | R   | Y   | L   | E   | N   | G   | K   | E   | T   | L   | Q   |
| Polymorphic residue | R   | Y   | L   | E   | N   | G   | K   | E   | T   | L   | Q   |

# HLA-C\*01:02:01:01

|                     | Residues |    |    |    |     |     |    |     |    |     |    |    |     |    |     |     |    |    |    |     |    |
|---------------------|----------|----|----|----|-----|-----|----|-----|----|-----|----|----|-----|----|-----|-----|----|----|----|-----|----|
|                     | 26       | 27 | 28 | 29 | 30  | 31  | 32 | 33  | 34 | 35  | 36 | 37 | 38  | 39 | 40  | 41  | 42 | 43 | 44 | 45  | 46 |
| Variability         | 0        | 0  | 0  | 0  | 0.3 | 0.1 | 0  | 1.5 | 0  | 0.6 | 0  | 0  | 0.3 | 0  | 0.4 | 0.1 | 0  | 0  | 0  | 0.9 | 0  |
| Reference residue   | S        | H  | S  | M  | R   | Y   | F  | Y   | T  | A   | V  | S  | R   | P  | G   | R   | G  | E  | P  | R   | F  |
| Polymorphic residue | S        | H  | S  | M  | K   | Y   | F  | F   | T  | S   | V  | S  | R   | P  | G   | R   | G  | E  | P  | R   | F  |

  

|                     | 47 | 48  | 49 | 50 | 51 | 52  | 53 | 54 | 55 | 56 | 57 | 58 | 59  | 60 | 61 | 62 | 63 | 64 | 65 | 66 | 67 |
|---------------------|----|-----|----|----|----|-----|----|----|----|----|----|----|-----|----|----|----|----|----|----|----|----|
| Variability         | 0  | 0.9 | 0  | 0  | 0  | 0.1 | 0  | 0  | 0  | 0  | 0  | 0  | 0.7 | 0  | 0  | 0  | 0  | 0  | 0  | 0  | 0  |
| Reference residue   | I  | A   | V  | G  | Y  | V   | D  | D  | T  | Q  | F  | V  | R   | F  | D  | S  | D  | A  | A  | S  | P  |
| Polymorphic residue | I  | S   | V  | G  | Y  | V   | D  | D  | T  | Q  | F  | V  | R   | F  | D  | S  | D  | A  | A  | S  | P  |

  

|                     | 68 | 69 | 70 | 71 | 72 | 73  | 74 | 75 | 76 | 77 | 78  | 79 | 80 | 81 | 82 | 83 | 84 | 85 | 86 | 87 | 88 |
|---------------------|----|----|----|----|----|-----|----|----|----|----|-----|----|----|----|----|----|----|----|----|----|----|
| Variability         | 0  | 0  | 0  | 0  | 0  | 0.2 | 0  | 0  | 0  | 0  | 0.1 | 0  | 0  | 0  | 0  | 0  | 0  | 0  | 0  | 0  | 0  |
| Reference residue   | R  | G  | E  | P  | R  | A   | P  | W  | V  | E  | Q   | E  | G  | P  | E  | Y  | W  | D  | R  | E  | T  |
| Polymorphic residue | R  | G  | E  | P  | R  | A   | P  | W  | V  | E  | Q   | E  | G  | P  | E  | Y  | W  | D  | R  | E  | T  |

  




|                     | 89 | 90  | 91 | 92 | 93 | 94 | 95 | 96 | 97 | 98 | 99 | 100 | 101 | 102 | 103 | 104 | 105 | 106 | 107 | 108 | 109 |
|---------------------|----|-----|----|----|----|----|----|----|----|----|----|-----|-----|-----|-----|-----|-----|-----|-----|-----|-----|
| Variability         | 0  | 0.6 | 0  | 0  | 0  | 0  | 0  | 0  | 1  | 0  | 0  | 0   | 1.1 | 0   | 0   | 1   | 0   | 0   | 0   | 0   | 0   |
| Reference residue   | Q  | N   | Y  | K  | R  | Q  | A  | Q  | A  | D  | R  | V   | S   | L   | R   | N   | L   | R   | G   | Y   | Y   |
| Polymorphic residue | Q  | K   | Y  | K  | R  | Q  | A  | Q  | T  | D  | R  | V   | N   | L   | R   | K   | L   | R   | G   | Y   | Y   |

  



|                     | 110 | 111 | 112 | 113 | 114 | 115 | 116 | 117 | 118 | 119 | 120 | 121 | 122 | 123 | 124 | 125 | 126 | 127 | 128 | 129 | 130 |
|---------------------|-----|-----|-----|-----|-----|-----|-----|-----|-----|-----|-----|-----|-----|-----|-----|-----|-----|-----|-----|-----|-----|
| Variability         | 0   | 0   | 0   | 0   | 0.9 | 0.2 | 0   | 0   | 0.8 | 1   | 0   | 1   | 0   | 1.1 | 0   | 0   | 0   | 0.5 | 0   | 0   | 0   |
| Reference residue   | N   | Q   | S   | E   | A   | G   | S   | H   | T   | L   | Q   | R   | M   | S   | G   | C   | D   | L   | G   | P   | D   |
| Polymorphic residue | N   | Q   | S   | E   | A   | G   | S   | H   | T   | L   | Q   | W   | M   | Y   | G   | C   | D   | L   | G   | P   | D   |

|                     | 131 | 132 | 133 | 134 | 135 | 136 | 137 | 138 | 139 | 140 | 141 | 142 | 143 | 144 | 145 | 146 | 147 | 148 | 149 | 150 | 151 |
|---------------------|-----|-----|-----|-----|-----|-----|-----|-----|-----|-----|-----|-----|-----|-----|-----|-----|-----|-----|-----|-----|-----|
| Variability         | 0   | 0   | 0   | 0   | 0   | 0   | 0.4 | 1   | 0   | 1.7 | 0   | 0   | 0   | 0.1 | 0   | 0   | 0   | 0   | 0   | 0   | 0   |
| Reference residue   | G   | R   | L   | L   | R   | G   | Y   | D   | Q   | S   | A   | Y   | D   | G   | K   | D   | Y   | I   | A   | L   | N   |
| Polymorphic residue | G   | R   | L   | L   | R   | G   | Y   | D   | Q   | Y   | A   | Y   | D   | G   | K   | D   | Y   | I   | A   | L   | N   |

Residues

|                     | 152 | 153 | 154 | 155 | 156 | 157 | 158 | 159 | 160 | 161 | 162 | 163 | 164 | 165 | 166 | 167 | 168 | 169 | 170 | 171 | 172 |
|---------------------|-----|-----|-----|-----|-----|-----|-----|-----|-----|-----|-----|-----|-----|-----|-----|-----|-----|-----|-----|-----|-----|
| Variability         | 0   | 0   | 0   | 0   | 0   | 0   | 0   | 0   | 0   | 0   | 0.5 | 0   | 0   | 0   | 0   | 0.2 | 0   | 0   | 0   | 0.7 | 0   |
| Reference residue   | E   | D   | L   | R   | S   | W   | T   | A   | A   | D   | T   | A   | A   | Q   | I   | T   | Q   | R   | K   | W   | E   |
| Polymorphic residue | E   | D   | L   | R   | S   | W   | T   | A   | A   | D   | T   | A   | A   | Q   | I   | T   | Q   | R   | K   | W   | E   |

|                     | 173 | 174 | 175 | 176 | 177 | 178 | 179 | 180 | 181 | 182 | 183 | 184 | 185 | 186 | 187 | 188 | 189 | 190 | 191 | 192 | 193 |
|---------------------|-----|-----|-----|-----|-----|-----|-----|-----|-----|-----|-----|-----|-----|-----|-----|-----|-----|-----|-----|-----|-----|
| Variability         | 0   | 0   | 0   | 1.1 | 0   | 0   | 0   | 1.7 | 0   | 0   | 0   | 0   | 0   | 0   | 1.2 | 0   | 0   | 0   | 0   | 0   | 0   |
| Reference residue   | A   | A   | R   | E   | A   | E   | Q   | W   | R   | A   | Y   | L   | E   | G   | T   | C   | V   | E   | W   | L   | A   |
| Polymorphic residue | A   | A   | R   | E   | A   | E   | Q   | R   | R   | A   | Y   | L   | E   | G   | T   | C   | V   | E   | W   | L   | A   |

|                     | 194 | 195 | 196 | 197 | 198 | 199 | 200 | 201 | 202 | 203 | 204 |
|---------------------|-----|-----|-----|-----|-----|-----|-----|-----|-----|-----|-----|
| Variability         | 0.2 | 0   | 0   | 0.6 | 0   | 0.2 | 0.1 | 0.7 | 0   | 0   | 0   |
| Reference residue   | R   | Y   | L   | E   | N   | G   | K   | E   | T   | L   | Q   |
| Polymorphic residue | R   | Y   | L   | E   | N   | G   | K   | E   | T   | L   | Q   |

**Figure S1.** Methods flowchart.

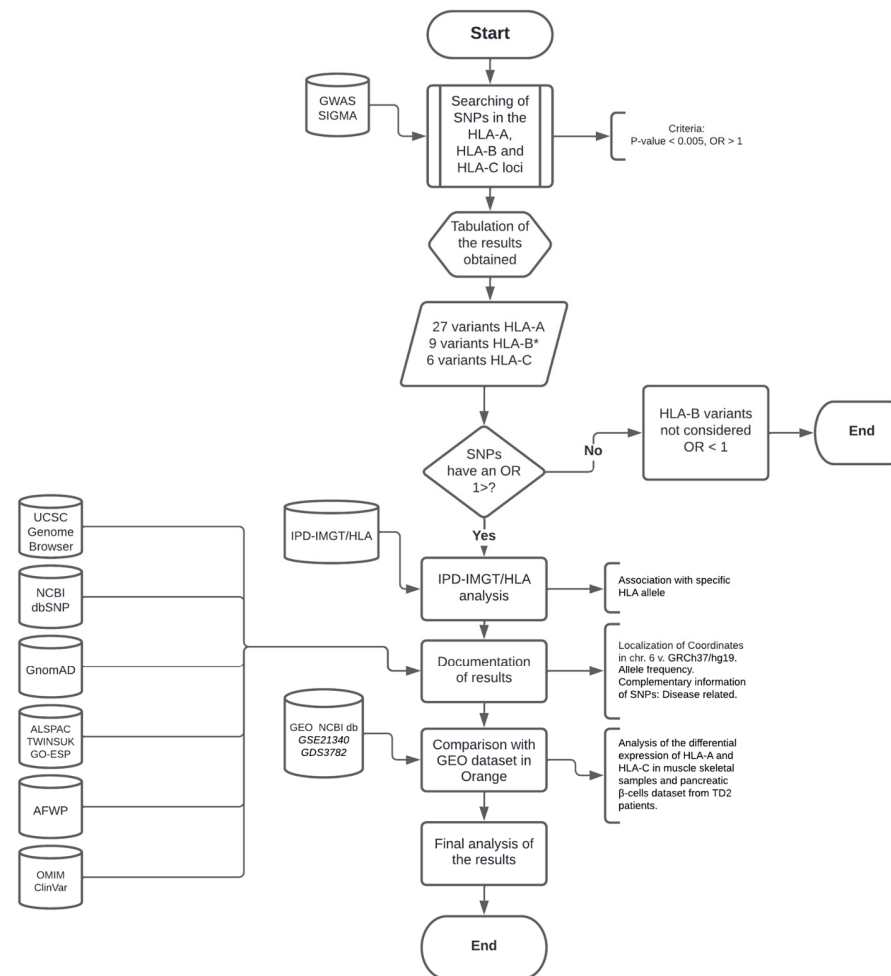

**Figure S2.** HLA-A\*03:01:01:01 allele frequency in worldwide populations.

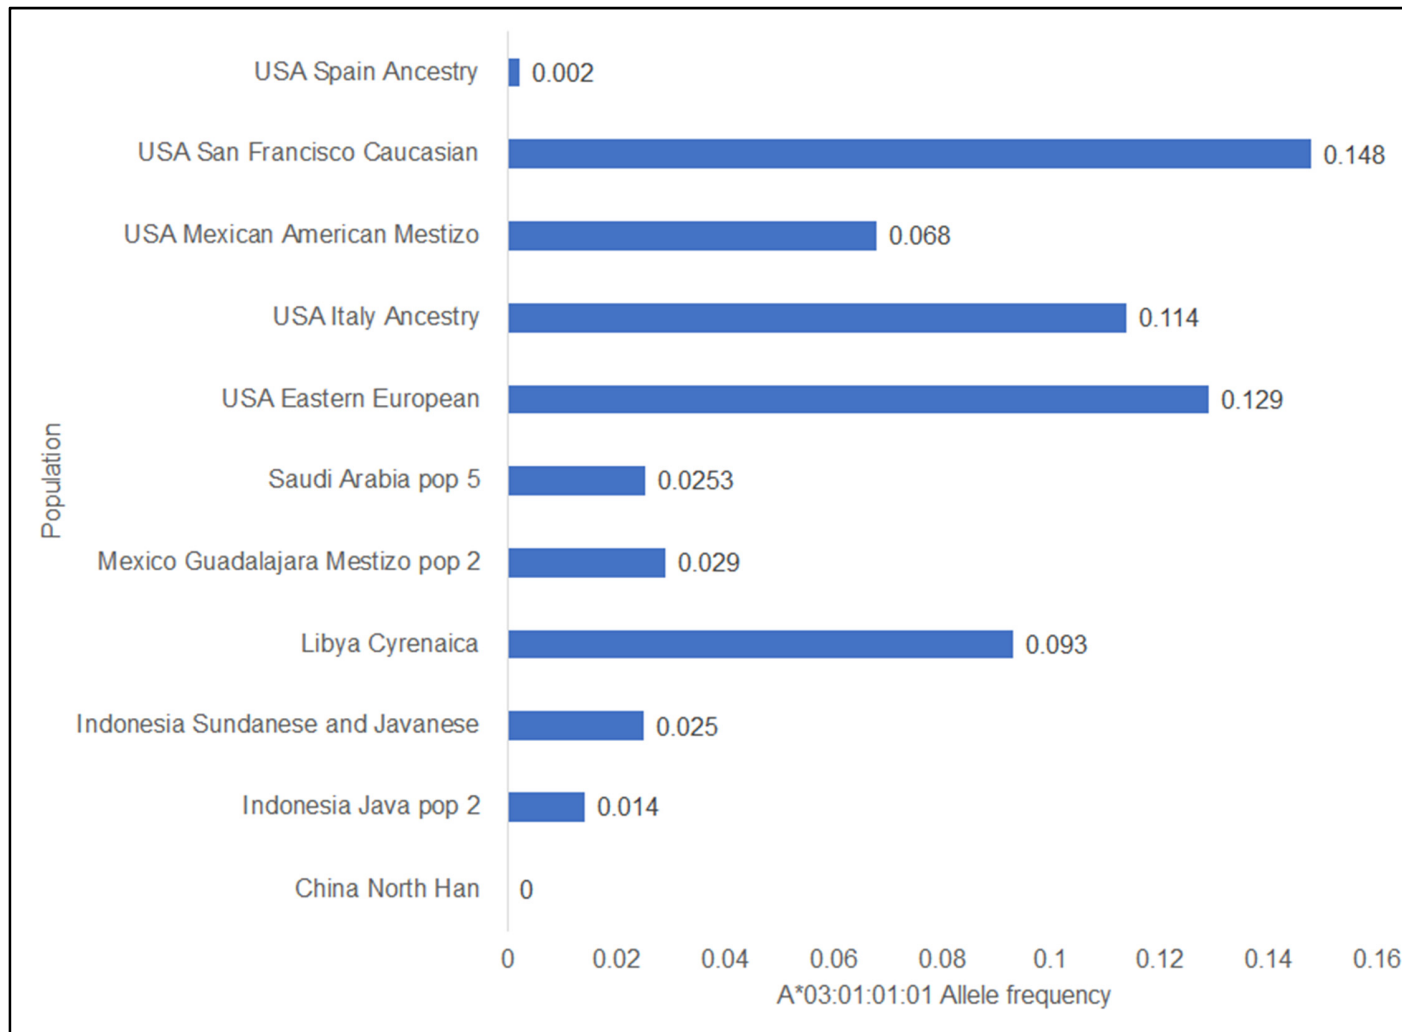

For the allele HLA-A\*03:01:01:01, the group that presented the highest frequency was the USA San Francisco Caucasian population (0.148). Frequencies obtained from *Allele frequencies in Worldwide populations* database, available at <http://www.allelefrequencies.net/>.

**Figure S3.** HLA-C\*01:02:01:01 frequency in worldwide populations.

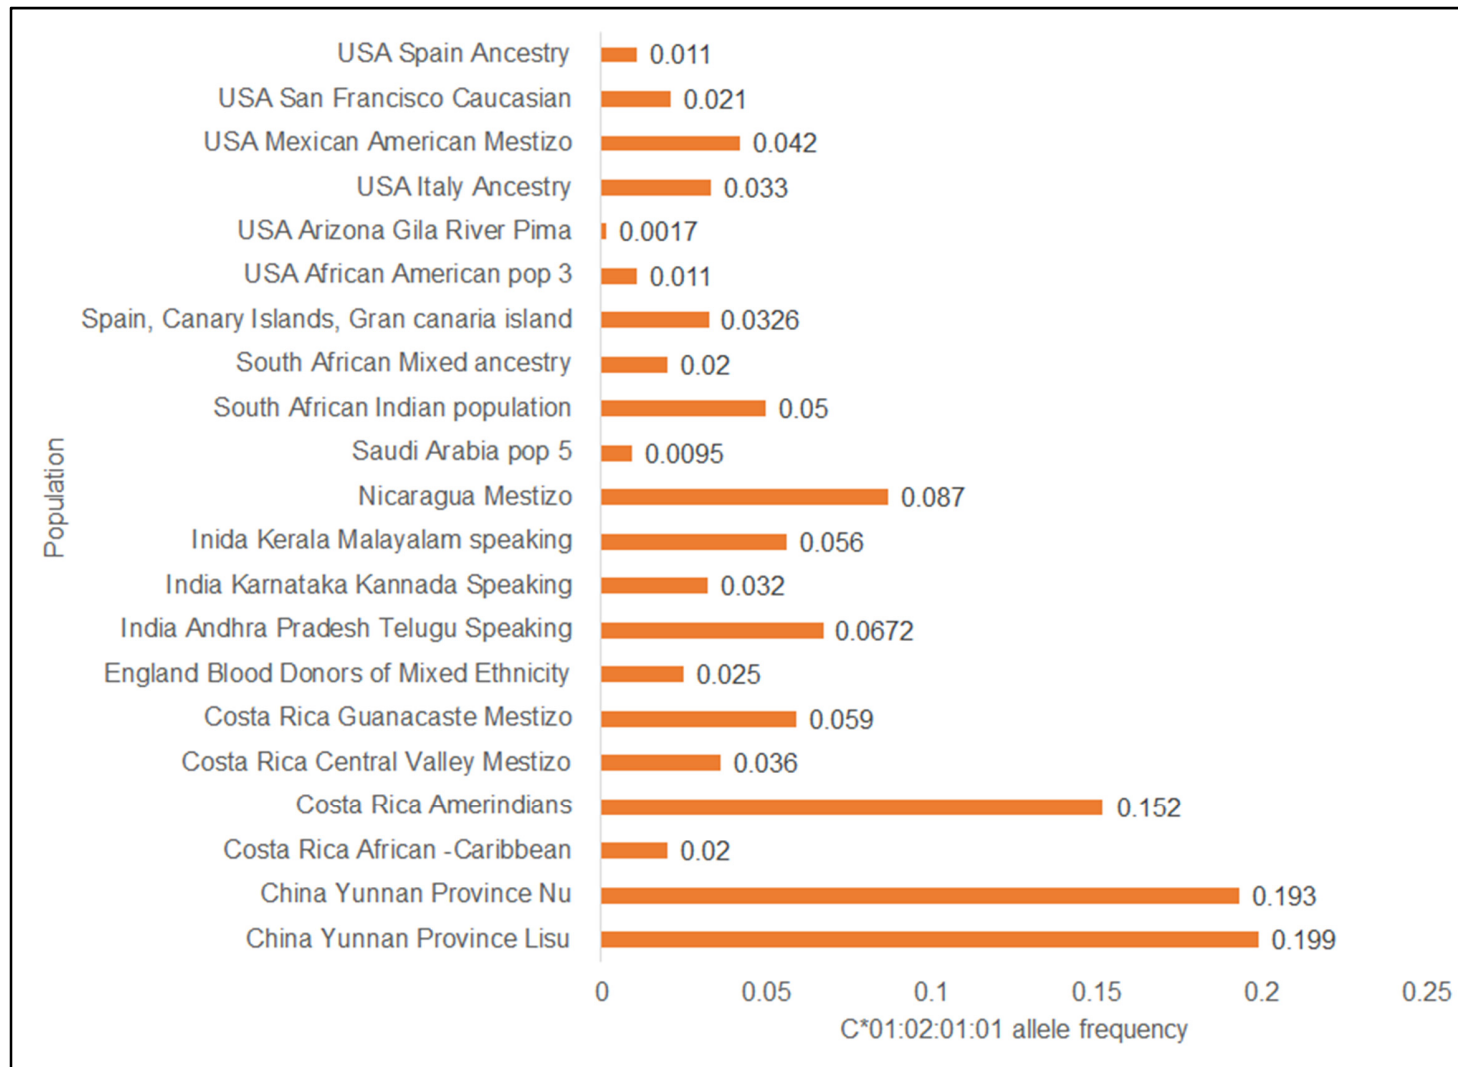

For the allele HLA-C\*01:02:01:01, the group that presented the highest frequency was the China Yunnan Province Lisu population (0.199). Frequencies obtained from *Allele frequencies in Worldwide populations* database, available at <http://www.allelefrequencies.net/>.

**Figure S4.** HLA.A and HLA-C differential expression values from muscle tissue obtained from a group with T2D compared to a control group with a positive family history for T2D and a control group with a negative family history for diabetes.

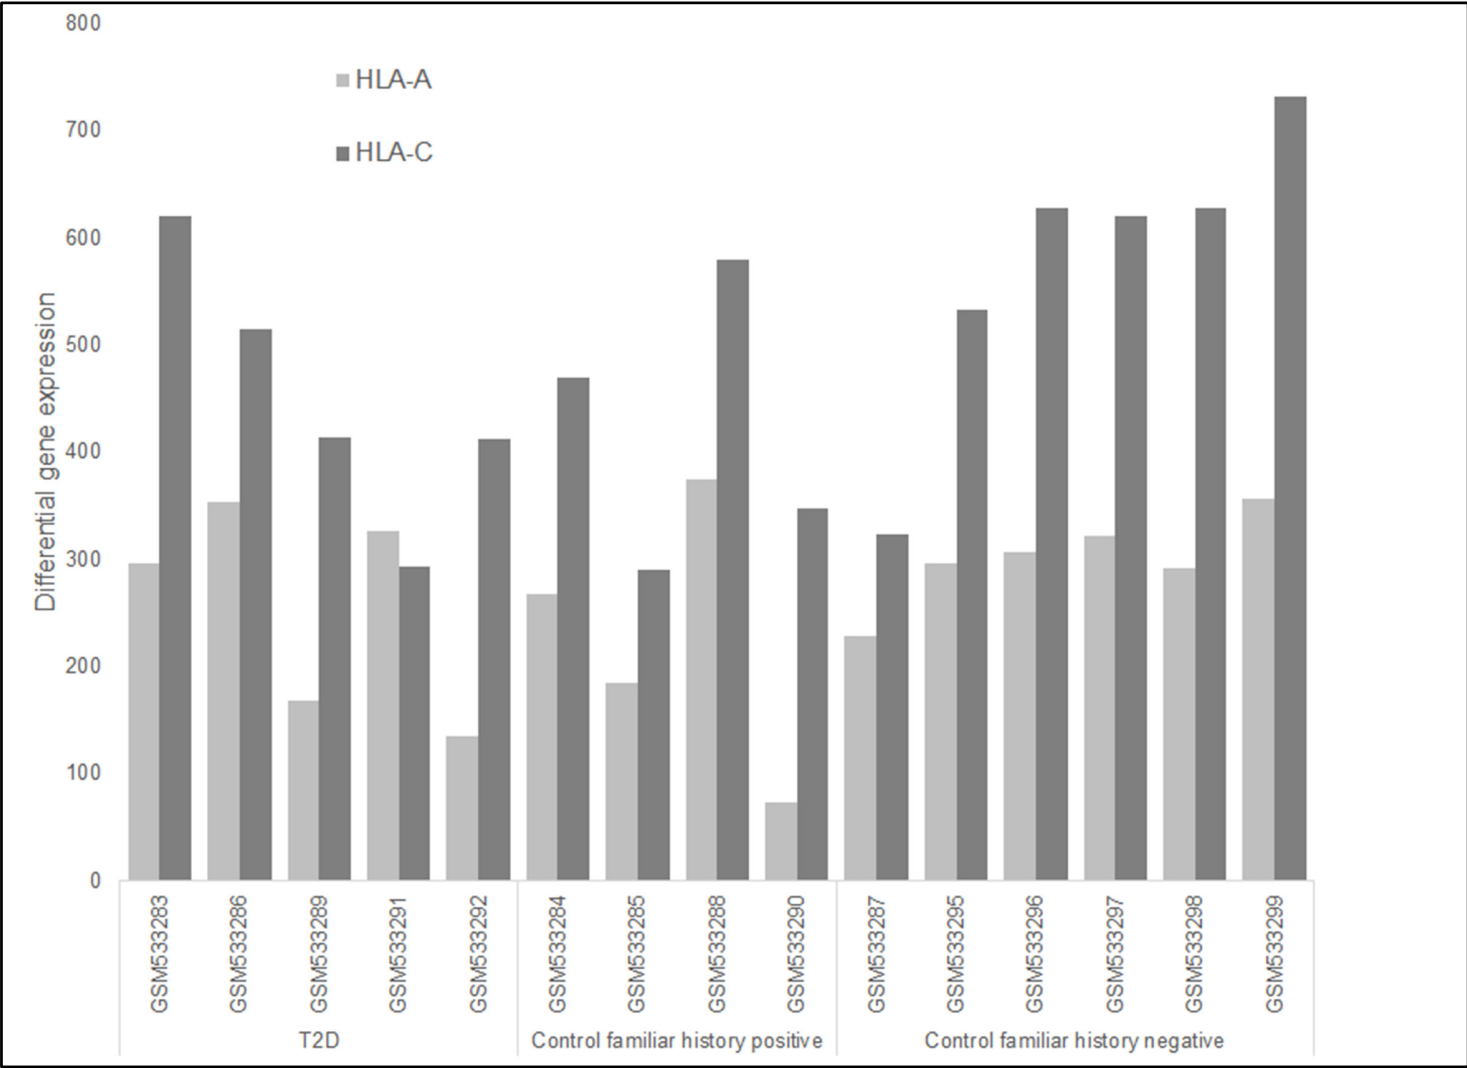

No significant differences were found between the different groups using the Mann Whitey U test when compared individually, but in a group there are differences. Genetic expression data obtained from the database *Omnibus* (GEO) (<https://www.ncbi.nlm.nih.gov/gds>) with access ID GSE21340 *Human skeletal muscle - type 2 diabetes and family history positive individuals - Mexican American*.

**Figure S5.** Fisher's exact test of the expression values obtained from the group with Type 2 Diabetes (DT2) compared to a control group with a positive family history for DT2 and a control group with a negative family history for diabetes.

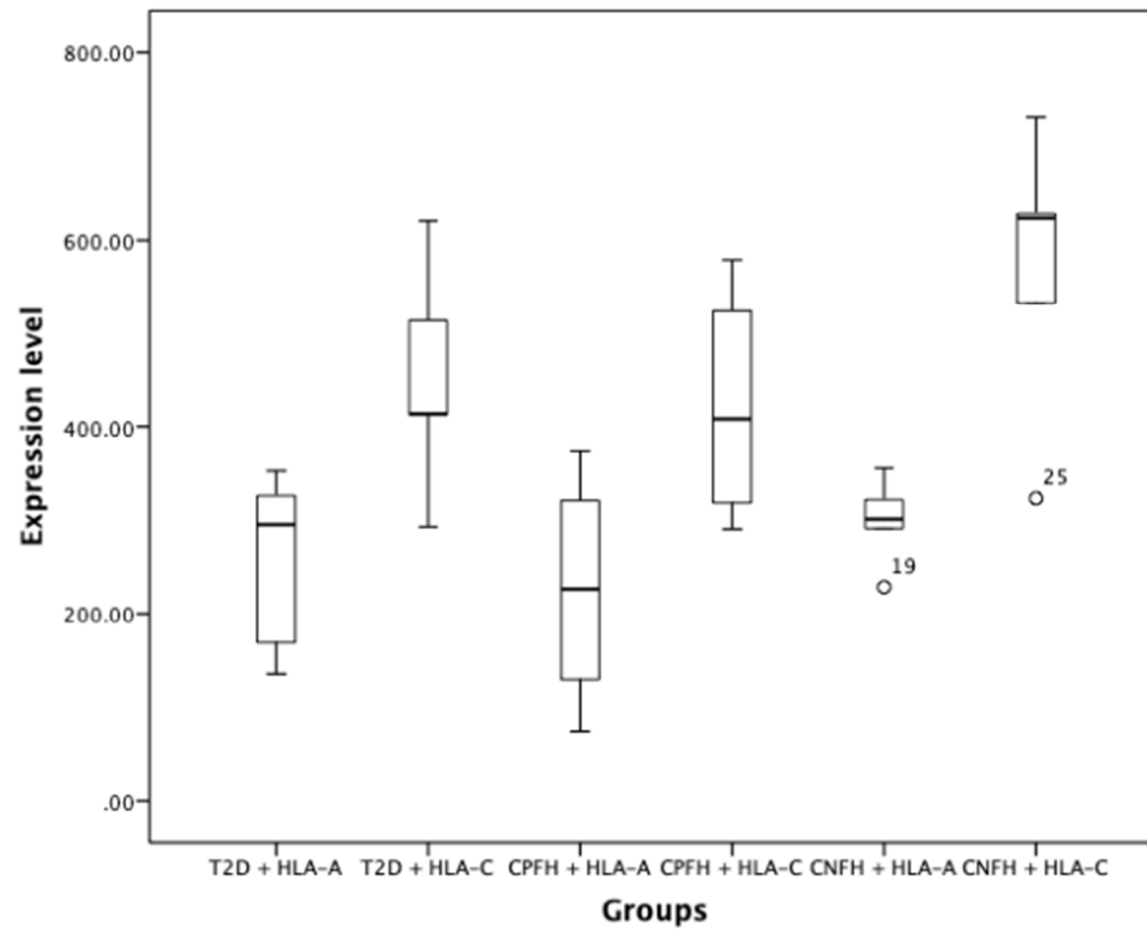

The differences between the levels of expression between HLA A ( $p < 0.027$ ) HLA C ( $p < 0.047$ ) of the group with T2D and the control group with negative family history are the most important in our analysis, while there are no differences between the group with T2D and the control group with positive family history. Genetic expression data obtained from the database *Omnibus* (GEO) (<https://www.ncbi.nlm.nih.gov/gds>) with access ID GSE21340 *Human skeletal muscle - type 2 diabetes and family history positive individuals - Mexican American*.
